# Supplementary material for: Specific sensory neurons and insulin-like peptides modulate food type-dependent oogenesis and fertilization in Caenorhabditis elegans
Source: eLife. 2023 Nov 17;12:e83224. doi: 10.7554/eLife.83224 (PMC10665013; doi:10.7554/eLife.83224)
Supplement: Figure 8—source data 1. — Sheet 1 shows the analyses for fertilization rates before normalization; and sheet 2, for normalized fertilization rates. N is the total number of animals that were assayed. Means are from pooled data from multiple, independent trials. SD is the standard deviation. Figure 8 panels associated with the data are indicated. Significant p values are shown in red and italicized. # denotes experiments in which animals that carry the daf-2(e1368) or daf-2(e1370) mutation and the corresponding controls were grown at 20°C and transferred to 25°C at the early L4 stage. The following abbreviation and superscripted letters denote: WT, wild type; NA, not applicable; A, p values between a given strain on OP50 versus CS180 at each time point; B, p values between a given strain grown on OP50 versus wild type on OP50; and C, p values between a given strain grown on CS180 versus wild type on CS180; D, p values between a given strain versus the indicated insulin-like peptide (ILP) double or triple mutant on OP50; and E, p values between a given strain versus the indicated ILP double or triple mutant on CS180. [file elife-83224-fig8-data1.xlsx]

## Sheet: Fertilization rates
Figure 8 - Source Data 1
Food type-dependent fertilization rates in wild type versus insulin pathway mutants											Mean values are in eggs/hr.
wild type versus daf-2 mutants#
(Fig. 8A-B)	WT OP50			WT CS180			p (OP50 vs. CS180)A	p (OP50 vs. WT OP50)B	p (CS180 vs. WT CS180)C
Hours	Mean	SD	N	Mean	SD	N
6	0.53	0.51	30	0.97	0.79	29	0.0562	NA
12	3.55	0.57	30	5.29	0.9	30	0.0001
18	4	0.44	30	5.45	0.72	30	0.0001
24	5.27	0.54	30	6.73	0.44	30	0.0001
(Fig. 8A)	daf-2(e1368) OP50			daf-2(e1368) CS180
Hours	Mean	SD	N	Mean	SD	N
6	0.71	0.55	30	1.31	0.79	30	0.0012	0.8682	0.07
12	2.77	0.57	29	4.22	0.65	30	0.0001	0.0001	0.0001
18	4.24	0.72	30	5.39	0.52	30	0.0001	0.6055	0.9988
24	4.94	0.41	30	6.56	0.56	29	0.0001	0.2567	0.8778
(Fig. 8B)	daf-2(e1370) OP50			daf-2(e1370) CS180
Hours	Mean	SD	N	Mean	SD	N
6	0.59	0.47	30	1.57	0.94	29	0.0001	0.9992	0.0013
12	0.88	0.46	30	2	0.52	30	0.0001	0.0001	0.0001
18	1.53	0.36	30	2.64	0.37	29	0.0001	0.0001	0.0001
24	1.45	0.38	30	2.57	0.58	35	0.0001	0.0001	0.0001
wild type versus insulin signaling mutants
(Fig. 8C-F)	WT OP50			WT CS180			p (OP50 vs. CS180)A	p (OP50 vs. WT OP50)B	p (CS180 vs. WT CS180)C
Hours	Mean	SD	N	Mean	SD	N
6	0.6	0.49	12	1.67	1.17	15	0.0034	NA
12	3.18	0.71	30	4.06	0.81	30	0.001
18	4.31	0.8	30	5.96	0.63	30	0.001
24	5.23	0.55	30	6.66	0.64	30	0.001
(Fig. 8C)	daf-16 OP50			daf-16 CS180
Hours	Mean	SD	N	Mean	SD	N
6	1.3	0.74	40	2.82	1.13	30	0.0001	0.073	0.0001
12	2.65	0.8	40	4.27	0.65	39	0.0001	0.1556	0.9649
18	4.05	0.74	40	5.73	0.74	38	0.0001	0.8876	0.9329
24	4.83	0.6	40	6.56	0.49	42	0.0001	0.3697	0.9998
(Fig. 8D)	ins-6 OP50			ins-6 CS180
Hours	Mean	SD	N	Mean	SD	N
6	0.78	0.85	24	0.85	0.78	14	0.9999	0.9993	0.06
12	3.24	0.75	29	3.82	0.78	30	0.0479	0.9999	0.9462
18	4.19	0.66	28	5.52	0.41	30	0.0001	0.9997	0.3127
24	5.23	0.84	30	6.67	0.74	30	0.0001	0.9999	0.9999
(Fig. 8E)	daf-28 OP50			daf-28 CS180
Hours	Mean	SD	N	Mean	SD	N
6	0.76	0.62	30	1.31	0.7	17	0.4832	0.9997	0.9156
12	2.98	0.54	26	4.59	0.56	25	0.0001	0.9881	0.1309
18	3.96	0.84	29	5.55	0.61	29	0.0001	0.657	0.4184
24	5.32	0.61	27	6.65	0.34	25	0.0001	0.999	0.999
(Fig. 8F)	ins-1 OP50			ins-1 CS180
Hours	Mean	SD	N	Mean	SD	N
6	1.26	0.48	30	2.38	0.83	28	0.0288	0.1543	0.0423
12	2.86	0.69	30	4.25	0.67	29	0.0001	0.7377	0.9875
18	4.12	0.56	30	5.51	0.68	30	0.0001	0.9901	0.2721
24	5.11	0.45	29	6.54	0.84	30	0.0001	0.9998	0.9997
ILP mutant combinations
	WT OP50			WT CS180			p (OP50 vs. CS180)A	p (OP50 vs. WT OP50)B	p (CS180 vs. WT CS180)C	p (OP50 vs. ins-6; daf-28 OP50)D	p (CS180 vs. ins-6; daf-28 CS180)E
Hours	Mean	SD	N	Mean	SD	N
22	3.8	1.38	35	6.5	0.73	36	< 0.0001	NA	NA	> 0.9999	< 0.0001
	ins-6 OP50			ins-6 CS180
Hours	Mean	SD	N	Mean	SD	N
22	3.78	0.81	36	5.41	1.18	34	< 0.0001	> 0.9999	< 0.0001	> 0.9999	0.9974
	daf-28 OP50			daf-28 CS180
Hours	Mean	SD	N	Mean	SD	N
22	4.02	0.74	34	5.86	0.89	33	< 0.0001	0.9844	0.1443	0.9279	0.1221
	ins-6; daf-28 OP50			ins-6; daf-28 CS180
Hours	Mean	SD	N	Mean	SD	N
22	3.73	0.67	37	5.24	1.07	34	< 0.0001	> 0.9999	< 0.0001	NA	NA
	WT OP50			WT CS180			p (OP50 vs. CS180)A	p (OP50 vs. WT OP50)B	p (CS180 vs. WT CS180)C	p (OP50 vs. ins-6; ins-1 OP50)D	p (CS180 vs. ins-6; ins-1 CS180)E
Hours	Mean	SD	N	Mean	SD	N
22	4.2	1.02	54	5.24	1.29	36	0.0003	NA	NA	0.9676	0.6094
	ins-6 OP50			ins-6 CS180
Hours	Mean	SD	N	Mean	SD	N
22	3.72	1.04	54	4.9	1.37	43	< 0.0001	0.2846	0.8787	0.027	0.9998
	ins-1 OP50			ins-1 CS180
Hours	Mean	SD	N	Mean	SD	N
22	4.33	0.72	42	5.48	1.21	37	< 0.0001	0.999	0.9753	> 0.9999	0.0792
	ins-6; ins-1 OP50			ins-6; ins-1 CS180
Hours	Mean	SD	N	Mean	SD	N
22	4.42	0.8	45	4.79	1.08	46	0.7238	0.9676	0.6094	NA	NA
	WT OP50			WT CS180			p (OP50 vs. CS180)A	p (OP50 vs. WT OP50)B	p (CS180 vs. WT CS180)C	p (OP50 vs. ins-1; daf-28 OP50)D	p (CS180 vs. ins-1; daf-28 CS180)E
Hours	Mean	SD	N	Mean	SD	N
22	3.43	0.7	34	5.52	1.6	34	< 0.0001	NA	NA	0.9874	0.1597
	ins-1 OP50			ins-1 CS180
Hours	Mean	SD	N	Mean	SD	N
22	3.95	1.08	32	5.71	1.21	31	< 0.0001	0.4897	0.9969	0.9515	0.0284
	daf-28 OP50			daf-28 CS180
Hours	Mean	SD	N	Mean	SD	N
22	3.53	0.85	34	4.61	1.28	34	0.0009	> 0.9999	0.0122	0.9997	0.9827
	ins-1; daf-28 OP50			ins-1; daf-28 CS180
Hours	Mean	SD	N	Mean	SD	N
22	3.66	0.75	34	4.85	0.72	35	0.0001	0.9874	0.1597	NA	NA
	WT OP50			WT CS180			p (OP50 vs. CS180)A	p (OP50 vs. WT OP50)B	p (CS180 vs. WT CS180)C	p (OP50 vs. ins-6; ins-1; daf-28 OP50)D	p (CS180 vs. ins-6; ins-1; daf-28 CS180)E
Hours	Mean	SD	N	Mean	SD	N
22	3.9	1.16	34	6.47	1.48	36	< 0.0001	NA	NA	0.9998	< 0.0001
	ins-6; daf-28 OP50			ins-6; daf-28 CS180
Hours	Mean	SD	N	Mean	SD	N
22	4.16	1.71	34	5.63	1.69	35	0.0013	0.9993	0.3135	0.9431	0.2258
	ins-6; ins-1 OP50			ins-6; ins-1 CS180
Hours	Mean	SD	N	Mean	SD	N
22	5.21	1.6	30	5.43	1.41	32	0.9998	0.0136	0.0999	0.0016	0.6166
	ins-1; daf-28 OP50			ins-1; daf-28 CS180
Hours	Mean	SD	N	Mean	SD	N
22	4.25	1.35	30	7	1.84	35	< 0.0001	0.9941	0.8834	0.8713	< 0.0001
	ins-6; ins-1; daf-28 OP50			ins-6; ins-1; daf-28 CS180
Hours	Mean	SD	N	Mean	SD	N
22	3.68	0.86	33	4.73	1.13	34	0.0993	0.9998	< 0.0001	NA	NA

## Sheet: Normalized fertilization rates
Figure 8 - Source Data 1
Comparisons between changes in fertilization rates of wild type vs insulin pathway mutants						Normalized mean values are in eggs/hr.
	Normalized mean (12-24 hours)
(Fig. 8A-B)	OP50	CS180	Ratio of standard error	p value vs. the change on CS180 of controls
WT#	1	1.38	0.03	-
daf-2(e1368)#	1	1.36	0.05	0.787
daf-2(e1370)#	1	1.93	0.14	0.0002
(Fig. 8C-F)
WT	1	1.31	0.05	-
daf-16	1	1.45	0.05	0.03
ins-6	1	1.27	0.07	0.643
daf-28	1	1.41	0.06	0.152
ins-1	1	1.36	0.04	0.389
